# Supplementary material for: Heavy metal concentrations in soil and ecological risk assessment in the vicinity of Tianzhu Industrial Park, Qinghai-Tibet Plateau
Source: PeerJ. 2024 Nov 15;12:e18510. doi: 10.7717/peerj.18510 (PMC11572346; doi:10.7717/peerj.18510)
Supplement: Data S1 [file peerj-12-18510-s002.xlsx]

## Sheet: Sheet1
Depth	Direction	Distance	Repeat	As	Cd	Cr	Cu	Hg	Mn	Ni	Pb	Se	Zn
10	East	500	1	16.2072	0.840964	100.239	46.4236	0.0760734	623.132	82.9847	50.2567	0.535166	145.348
10	East	500	2	17.0031	0.841866	101.991	39.8248	0.0774094	623.357	82.9351	49.8726	0.539626	145.759
10	East	500	3	15.7531	0.823232	100.199	39.8327	0.0726947	621.988	81.8562	48.0183	0.548895	145.987
10	East	1000	1	18.5129	0.821012	85.5706	43.6168	0.079043	648.078	78.0721	47.2496	0.629357	146.584
10	East	1000	2	19.1752	0.820346	89.0305	41.7081	0.0812264	645.531	78.4392	45.6179	0.616325	141.947
10	East	1000	3	17.9625	0.80657	89.0305	41.7081	0.0823711	645.232	77.0456	53.4366	0.621342	140.354
10	East	1500	1	15.5093	0.790829	101.235	35.2519	0.0715619	643.696	79.2671	27.261	0.481418	114.419
10	East	1500	2	15.207	0.780491	88.9773	36.1122	0.0711177	645.145	78.7903	26.8746	0.416076	113.908
10	East	1500	3	14.9685	0.785244	100.119	37.1144	0.072102	642.488	78.806	27.0304	0.535602	115.224
10	South	500	1	22.2459	0.91337	66.345	32.9288	0.212943	704.835	51.9101	28.9222	0.323418	155.591
10	South	500	2	22.2655	0.919196	67.8834	34.812	0.216183	711.657	57.4697	28.7074	0.317685	154.764
10	South	500	3	21.9385	0.916341	64.6373	31.1877	0.210829	705.759	56.935	28.5512	0.344211	156.636
10	South	1000	1	19.2288	0.682658	71.3178	32.896	0.088228	664.083	54.1344	26.3225	0.305208	151.262
10	South	1000	2	20.4022	0.690006	70.902	32.883	0.0904406	661.733	58.5734	25.9904	0.331164	151.401
10	South	1000	3	21.6282	0.675283	74.8657	31.1319	0.0889074	659.041	58.8522	25.91	0.310076	152.775
10	South	1500	1	21.1273	0.69984	89.2615	40.519	0.108	744.311	69.6607	28.1562	0.300399	126.946
10	South	1500	2	20.1149	0.685836	84.4574	39.873	0.125	738.742	65.6616	27.8215	0.325679	130.331
10	South	1500	3	21.0241	0.682877	88.6774	40.2538	0.109	757.585	67.4202	28.3516	0.330012	128.991
10	West	500	1	37.368	0.850966	111.484	33.3665	0.205608	698.606	82.4701	26.3384	0.811863	140.837
10	West	500	2	34.2443	0.863245	114.142	29.5994	0.185878	701.216	82.2304	26.6462	0.818208	142.216
10	West	500	3	40.5077	0.880854	115.323	29.5699	0.195908	689.267	80.8443	26.0848	0.483592	140.98
10	West	1000	1	43.747	0.83996	94.1692	39.801	0.212448	810.547	85.8706	44.5767	0.589353	152.637
10	West	1000	2	47.6501	0.884601	96.4065	41.7081	0.208829	808.68	86.1039	41.1039	0.633695	154.788
10	West	1000	3	45.7006	0.851834	92.9127	42.0654	0.209629	808.812	85.8254	48.7798	0.692424	153.907
10	West	1500	1	34.6607	0.751624	92.4502	32.7689	0.189831	803.386	76.5837	24.5543	0.55993	161.554
10	West	1500	2	34.0256	0.723122	100.239	39.8486	0.191841	785.515	75.274	36.1626	0.881311	151.026
10	West	1500	3	31.5351	0.718363	91.2507	35.8918	0.196769	789.322	76.6753	30.4235	0.641211	162.259
10	North	500	1	50.1521	0.83994	62.2311	30.5777	0.176952	699.801	70.8167	27.6174	0.619701	139.841
10	North	500	2	50.0077	0.821429	57.6005	29.5464	0.189067	701.552	75.7063	28.6223	0.631158	136.988
10	North	500	3	50.0056	0.882218	77.0609	32.3676	0.207616	695.44	75.7666	29.8172	0.624522	133.513
10	North	1000	1	55.907	0.8399	54.9254	26.6667	0.194776	693.93	68.8557	29.3804	0.595781	120.796
10	North	1000	2	56.465	0.809809	55.0239	26.7145	0.181908	694.378	74.38	25.1208	0.52194	124.203
10	North	1000	3	56.2507	0.821151	47.1022	26.6879	0.183609	693.487	74.1884	30.3763	0.615624	122.087
10	North	1500	1	50.1515	0.842331	60.3586	34.6614	0.224791	822.61	77.6892	30.5025	0.620627	130.08
10	North	1500	2	51.1009	0.877913	47.1022	37.2436	0.227256	808.803	77.2754	29.4973	0.65235	134.635
10	North	1500	3	50.6839	0.866348	47.0366	37.1917	0.231891	806.384	80.7478	29.3888	0.57508	142.999
20	East	500	1	12.6504	0.59813	96.349	41.6832	0.064813	634.998	79.5862	48.6737	0.491842	136.888
20	East	500	2	11.7097	0.591665	96.4449	40.3306	0.0614668	637.522	81.0595	44.8357	0.398606	137.722
20	East	500	3	11.5949	0.582185	93.7263	42.621	0.0528032	631.946	82.0554	41.9112	0.493209	139.315
20	East	1000	1	14.2739	0.552647	100.119	35.2239	0.0447886	634.229	79.602	25.1081	0.43192	107.861
20	East	1000	2	15.3226	0.559753	100.139	35.2309	0.0523736	635.848	78.8217	24.4137	0.427866	106.986
20	East	1000	3	15.0998	0.52118	94.2817	35.266	0.0473451	635.485	78.9002	25.9928	0.434748	107.093
20	East	1500	1	14.5773	0.399711	100.159	35.2379	0.0443585	622.735	78.8373	24.351	0.44778	105.714
20	East	1500	2	14.8796	0.422571	89.0482	34.3489	0.0424756	624.95	79.2513	23.4863	0.418917	108.722
20	East	1500	3	14.8912	0.444291	96.5026	36.1698	0.0450503	624.452	79.713	23.0865	0.3945	107.613
20	South	500	1	18.5413	0.752581	61.2816	32.9878	0.086755	713.076	60.3149	28.3219	0.301076	130.855
20	South	500	2	18.2485	0.750339	63.1621	32.955	0.106755	698.029	59.8068	28.298	0.32497	130.127
20	South	500	3	18.1048	0.742958	64.5216	34.812	0.100097	695.842	59.807	28.2654	0.318729	127.909
20	South	1000	1	15.9385	0.551529	102.462	36.5297	0.0653539	664.681	60.3534	23.249	0.243399	120.409
20	South	1000	2	18.3073	0.552146	100.439	36.7339	0.0646212	682.571	62.4875	23.2773	0.262378	121.182
20	South	1000	3	17.9849	0.540343	104.036	37.2733	0.0732011	680.885	67.7696	23.4503	0.250548	122.185
20	South	1500	1	16.0587	0.573356	88.8536	44.0095	0.0850512	733.956	70.2364	26.1628	0.299225	125.174
20	South	1500	2	17.3763	0.568733	84.9682	40.39	0.0864132	732.491	69.4389	24.8441	0.297553	128.93
20	South	1500	3	15.8921	0.574691	85.5195	42.1975	0.0888112	735.37	69.4666	25.1291	0.29996	127.886
20	West	500	1	14.6351	0.607214	103.871	32.7363	0.18797	738.507	77.6119	21.5373	0.540667	115.622
20	West	500	2	11.8315	0.642995	103.871	29.8507	0.132925	724.975	76.7164	20.4756	0.468617	112.239
20	West	500	3	12.7111	0.625607	105.486	28.2756	0.138859	728.395	76.8618	20.3256	0.48625	114.994
20	West	1000	1	14.5267	0.618575	96.4065	38.5228	0.157466	823.213	80.8282	19.8417	0.49574	127.414
20	West	1000	2	13.5303	0.608348	96.4834	38.8524	0.156635	831.839	81.6896	20.8794	0.511187	129.109
20	West	1000	3	12.898	0.599213	95.3558	35.9777	0.172065	825.792	80.5262	20.8255	0.47353	125.274
20	West	1500	1	14.591	0.599144	92.7463	32.1393	0.164478	788.259	81.194	23.1029	0.556746	123.781
20	West	1500	2	14.8754	0.620097	100.06	35.899	0.176104	790.175	82.3389	20.9576	0.621122	122.514
20	West	1500	3	15.1999	0.641882	97.6423	31.4365	0.15579	781.834	78.7903	19.463	0.524721	123.458
20	North	500	1	12.5795	0.599282	57.7153	28.6085	0.155951	674.641	74.2624	24.1699	0.542614	117.026
20	North	500	2	12.5518	0.597233	44.586	28.5629	0.164391	677.647	72.6513	23.8749	0.56672	115.545
20	North	500	3	12.4956	0.588639	52.2284	28.5515	0.154984	676.88	72.2244	25.6008	0.52683	113.808
20	North	1000	1	12.0911	0.599143	68.5532	27.0028	0.152421	759.864	75.24	22.1918	0.51677	96.5524
20	North	1000	2	12.0738	0.619232	76.969	26.9491	0.157309	758.353	78.3612	24.3664	0.54468	99.0453
20	North	1000	3	11.4454	0.680832	74.1441	26.0748	0.148179	742.237	81.2102	23.8384	0.502209	107.783
20	North	1500	1	17.5478	0.686331	54.9144	33.0283	0.181337	805.113	76.0048	24.5319	0.617479	121.17
20	North	1500	2	18.4054	0.694738	57.7038	31.7919	0.19407	785.33	78.9316	24.8293	0.489755	122.384
20	North	1500	3	18.2098	0.610425	60.3947	33.0875	0.178613	794.399	80.5262	26.6362	0.48838	126.769
30	East	500	1	9.78769	0.708473	83.3831	42.5617	0.0448613	620.127	84.5267	43.8742	0.402546	138.027
30	East	500	2	9.94864	0.718246	81.9132	40.8123	0.0437313	622.039	82.9186	43.5609	0.443161	138.563
30	East	500	3	9.65736	0.742292	82.0602	39.8883	0.0430295	621.36	83.9649	42.5681	0.461109	136.518
30	East	1000	1	13.7074	0.453176	85.5536	32.4572	0.0408328	596.376	78.0566	23.8294	0.427957	104.839
30	East	1000	2	14.0833	0.485646	89.0305	32.4507	0.0400408	593.57	80.43	24.8962	0.449333	104.42
30	East	1000	3	13.9198	0.479922	85.5365	32.4507	0.0510402	608.401	78.041	19.4781	0.475254	104.42
30	East	1500	1	13.6668	0.398494	100.339	35.4009	0.0493743	597.826	79.7766	23.3387	0.41085	108.097
30	East	1500	2	12.6667	0.386181	100.179	34.3489	0.0428739	600.956	78.853	23.2205	0.427519	105.735
30	East	1500	3	12.8146	0.396855	100.139	34.3352	0.0475219	594.745	79.1202	23.397	0.384952	103.503
30	South	500	1	15.9422	0.60675	61.0383	31.0701	0.15509	697.34	61.0383	26.5194	0.254318	116.538
30	South	500	2	17.1458	0.599203	64.6631	34.8884	0.139491	701.954	62.0813	26.711	0.253589	116.726
30	South	500	3	16.4074	0.61484	62.4528	34.812	0.16016	702.805	66.7694	26.2719	0.259101	116.272
30	South	1000	1	16.7724	0.399641	92.1912	34.8606	0.0752739	685.458	73.1076	24.4728	0.240687	117.53
30	South	1000	2	17.1924	0.397171	88.7654	36.5224	0.0704273	678.642	74.6328	24.8027	0.248015	114.927
30	South	1000	3	15.339	0.405978	88.9596	42.1723	0.0741372	678.735	71.2154	24.353	0.237517	117.267
30	South	1500	1	14.4517	0.499124	89.0837	44.1235	0.0773904	726.992	73.1076	27.8716	0.299502	124.9
30	South	1500	2	17.6748	0.498247	93.3752	40.4463	0.0830843	725.941	71.3289	26.0768	0.298416	123.929
30	South	1500	3	16.7394	0.498866	92.7278	40.39	0.0793499	724.93	71.2296	27.5066	0.27497	119.578
30	West	500	1	12.9441	0.499025	110.985	35.3234	0.171701	750.448	82.7861	20.6716	0.520945	112.637
30	West	500	2	12.636	0.513723	107.794	29.3004	0.147997	743.871	81.1242	18.8621	0.470261	111.72
30	West	500	3	12.3864	0.521063	115.3	34.0434	0.152359	753.136	86.0044	18.8583	0.566952	113.578
30	West	1000	1	13.3814	0.472552	119.158	40.7046	0.153254	814.49	88.6744	19.7457	0.472253	125.796
30	West	1000	2	13.971	0.47411	115.162	39.7693	0.139978	823.225	87.2937	20.4071	0.477918	125.671
30	West	1000	3	13.0081	0.463505	116.959	36.2261	0.154359	814.988	86.3854	20.1185	0.471566	125.1
30	West	1500	1	13.3332	0.584182	85.4855	32.4314	0.164952	789.793	79.6956	21.8419	0.523577	122.463
30	West	1500	2	13.2134	0.499542	85.6047	32.4766	0.163628	788.603	80.8926	20.8699	0.523401	121.837
30	West	1500	3	11.6	0.510448	88.5657	32.4701	0.157918	785.259	79.9203	21.3459	0.521992	122.311
30	North	500	1	11.99	0.498449	57.5547	27.336	0.131153	670.179	70.6759	20.5893	0.510915	102.485
30	North	500	2	11.9446	0.509379	65.745	26.6561	0.15558	677.243	71.4144	24.505	0.495813	103.64
30	North	500	3	12.7099	0.498627	52.2284	27.6562	0.164266	663.848	75.3084	19.9461	0.489316	104.656
30	North	1000	1	11.417	0.498409	65.745	27.6507	0.128934	767.456	72.9063	23.5833	0.471753	107.519
30	North	1000	2	11.112	0.497315	70.8035	28.2418	0.128222	773.071	74.8807	24.8487	0.416726	108.194
30	North	1000	3	11.268	0.498409	71.3007	26.9491	0.129594	770.485	71.4002	22.7272	0.502844	103.222
30	North	1500	1	12.7883	0.509246	74.0704	32.412	0.157845	781.07	79.9364	24.3726	0.449155	122.39
30	North	1500	2	12.8199	0.519491	79.8528	31.424	0.154564	775.756	80.7478	24.8757	0.473966	123.906
30	North	1500	3	12.4355	0.586533	71.3149	32.1265	0.147404	770.639	80.7639	22.4709	0.474418	121.942
