# Supplementary material for: Heavy metal concentrations in soil and ecological risk assessment in the vicinity of Tianzhu Industrial Park, Qinghai-Tibet Plateau
Source: PeerJ. 2024 Nov 15;12:e18510. doi: 10.7717/peerj.18510 (PMC11572346; doi:10.7717/peerj.18510)
Supplement: Supplemental Information 1 [file peerj-12-18510-s001.xlsx]

## Sheet: Sheet1
	month	Monthly mean high temperature℃	Monthly mean low temperature℃	Monthly mean temperature	Monthly total precipitation
	1	2.4	-25.7	-11.6	9.5
	2	7	-14.2	-4.7	2.4
	3	15.2	-13.5	-1	22
	4	12.3	-7.1	0.3	119
	5	17	-5.5	6.6	61
	6	19.3	1.5	10.2	176
	7	23.8	4	14.4	85
	8	22.8	2.9	11.2	123
	9	20.3	3.5	9.6	174
	10	15.8	-6.5	1	23
	11	9	-19.4	-5.8	4.3
	12	-4.8	-9.9	-7.4	2.1
